# Supplementary material for: Myeloid-derived suppressor cell infiltration is associated with a poor prognosis in patients with hepatocellular carcinoma
Source: PubMed Central journal article supplement — Oncol Lett. 2022 Jan 27;23(3):93. doi: 10.3892/ol.2022.13213 (PMC8822414; doi:10.3892/ol.2022.13213), 2022-01-27
Supplement: Supplementary_Data.pdf [file Supplementary_Data.pdf]

Figure S1. Immunohistochemical staining of CD8<sup>+</sup> T cells in patients with hepatocellular carcinoma. (A) Image of a high CD8<sup>+</sup> T cell pattern. Magnification, x400. (B) Image of a low CD8<sup>+</sup> T cell infiltration pattern. Magnification, x400.

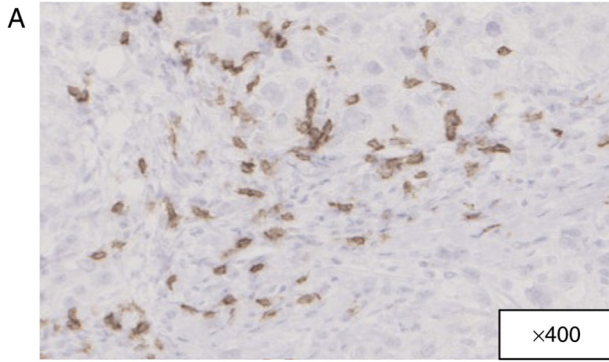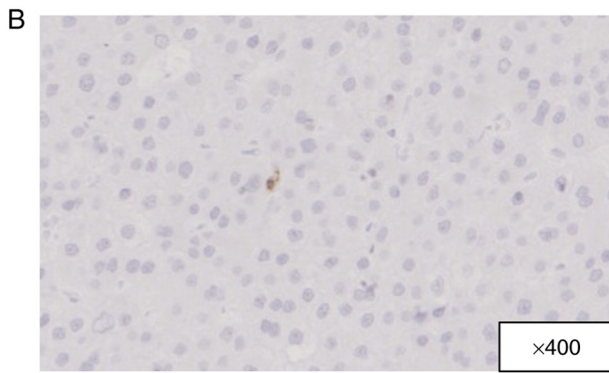

Figure S2. Kaplan-Meier curves showing the survival of patients with hepatocellular carcinoma according to the number of CD8<sup>+</sup> T cells in tumors. (A) Recurrence-free survival and (B) overall survival in all patients according to high and low numbers of CD8<sup>+</sup> T cells in tumors. CD8<sup>+</sup>Tc, CD8<sup>+</sup> T-cell.

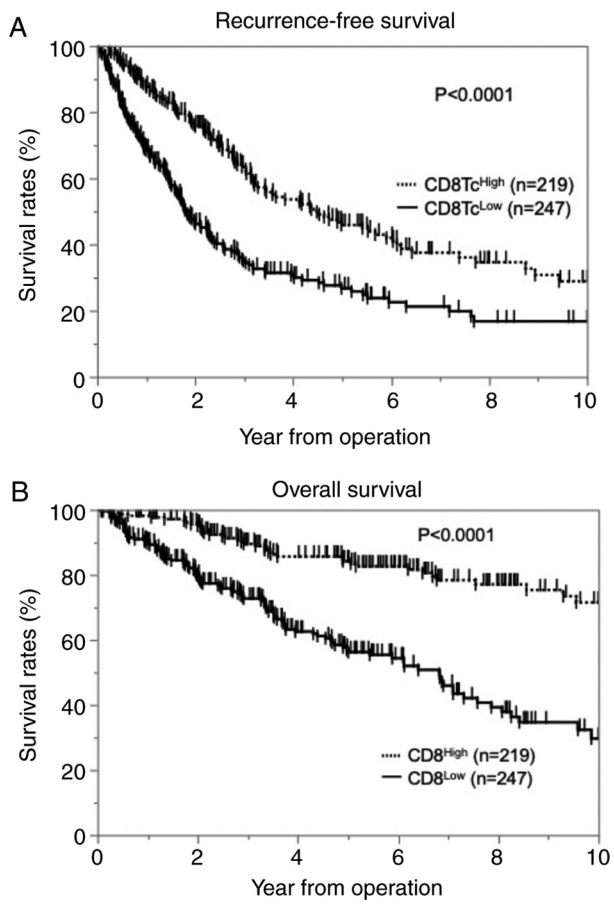

Table SI. Association of background characteristics of patients and intra-tumoral CD8 expression.

| Variable                                         | CD8 low (n=247)  | CD8 high (n=219) | P-value |
|--------------------------------------------------|------------------|------------------|---------|
| Age, years                                       | 69 (27-87)       | 69 (17-87)       | 0.5097  |
| Sex (male), n (%)                                | 193 (78.1)       | 151 (68.9)       | 0.0243  |
| BMI, kg/m <sup>2</sup>                           | 23.0 (14.2-37.9) | 23.0 (15.7-32.6) | 0.2403  |
| HBs-Ag positive, n (%)                           | 41 (16.6)        | 32 (14.6)        | 0.5432  |
| HCV-Ab positive, n (%)                           | 119 (48.2)       | 120 (54.8)       | 0.1538  |
| Child-Pugh classification, grade B, n (%)        | 11 (4.5)         | 5 (2.3)          | 0.1991  |
| Albumin, g/dl                                    | 4.0 (1.8-5.1)    | 4.0 (2.1-4.8)    | 0.6124  |
| DCP, mAU/ml                                      | 121 (2-250400)   | 52 (8-15430)     | 0.1665  |
| AFP, ng/ml                                       | 8.7 (1-994600)   | 10.7 (1-165385)  | 0.0868  |
| Performing preoperative TACE or TAE, n (%)       | 11 (4.5)         | 3 (1.4)          | 0.0516  |
| Tumor size, cm                                   | 3.8 (1.0-20)     | 3.8 (0.9-30)     | 0.0045  |
| Multiple tumors, n (%)                           | 64 (25.9)        | 36 (16.4)        | 0.0129  |
| BCLC staging, B or C, n (%)                      | 55 (22.3)        | 32 (14.7)        | 0.0363  |
| Gross classification, single nodular type, n (%) | 148 (60.4)       | 140 (64.2)       | 0.3985  |
| Poorly differentiation, n (%)                    | 80 (32.4)        | 63 (28.9)        | 0.4158  |
| Microscopic vascular invasion, n (%)             | 92 (37.3)        | 51 (23.3)        | 0.0011  |
| Microscopic intrahepatic metastasis, n (%)       | 63 (25.6)        | 20 (9.1)         | <0.0001 |
| F3 or F4, n (%)                                  | 104 (42.1)       | 192 (42.2)       | 0.9832  |

Data are presented as n (%) or median (range). BMI, body mass index; HBs-Ag, hepatitis B surface antigen; HCV-Ab, hepatitis C virus antibody; DCP, des- $\gamma$ -carboxy prothrombin; AFP,  $\alpha$ -fetoprotein; TA(C)E, transcatheter arterial (chemo)embolization; BCLC, Barcelona Clinic Liver Cancer.

Table SII. Background characteristics of patients who underwent hepatic resection for hepatocellular carcinoma.

| Variable                                         | Others (n=398)   | CD33 high/CD8 low (n=68) | P-value |
|--------------------------------------------------|------------------|--------------------------|---------|
| Age, years                                       | 69 (17-87)       | 70 (36-86)               | 0.6032  |
| Sex (male), n (%)                                | 289 (72.6)       | 55 (80.9)                | 0.1517  |
| BMI, kg/m <sup>2</sup>                           | 23.0 (15.7-37.9) | 22.5 (14.2-32.6)         | 0.2700  |
| HBs-Ag positive, n (%)                           | 59 (14.9)        | 14 (20.6)                | 0.2304  |
| HCV-Ab positive, n (%)                           | 211 (53.0)       | 28 (41.2)                | 0.0770  |
| Child-Pugh classification, grade B, n (%)        | 14 (3.5)         | 2 (2.9)                  | 0.8094  |
| Albumin, g/dl                                    | 4.0 (2.1-5.1)    | 3.9 (1.8-4.8)            | 0.0668  |
| DCP, mAU/ml                                      | 73 (2-250400)    | 219 (9-75000)            | 0.4740  |
| AFP, ng/ml                                       | 8.3 (1-693700)   | 28.1 (1-994600)          | 0.0007  |
| Performing preoperative TACE or TAE, n (%)       | 10 (2.6)         | 4 (5.9)                  | 0.1325  |
| Tumor size, cm                                   | 3.2 (0.9-30)     | 4.5 (1-20)               | 0.0001  |
| Multiple tumors, n (%)                           | 80 (20.1)        | 20 (29.4)                | 0.0839  |
| BCLC staging, B or C, n (%)                      | 63 (15.9)        | 24 (35.3)                | 0.0004  |
| Gross classification, single nodular type, n (%) | 255 (64.4)       | 80 (49.3)                | 0.0181  |
| Poorly differentiation, n (%)                    | 108 (27.2)       | 35 (51.1)                | <0.0001 |
| Microscopic vascular invasion, n (%)             | 107 (26.9)       | 36 (52.9)                | <0.0001 |
| Microscopic intrahepatic metastasis, n (%)       | 58 (14.6)        | 25 (36.8)                | <0.0001 |
| F3 or F4, n (%)                                  | 171 (43.1)       | 25 (36.8)                | 0.3304  |

Data are presented as n (%) or median (range). BMI, body mass index; HBs-Ag, hepatitis B surface antigen; HCV-Ab, hepatitis C virus antibody; DCP, des- $\gamma$ -carboxy prothrombin; AFP,  $\alpha$ -fetoprotein; TA(C)E, transcatheter arterial (chemo)embolization; BCLC, Barcelona Clinic Liver Cancer.
